# Supplementary material for: Leaching of Major and Minor Elements during the Transport and Storage of Coal Ash Obtained in Power Plant
Source: Hindawi journal article supplement (doi:10.1155/2014/212506), 2014-01-01
Supplement: f1 [file 212506.f1.pdf]

## **Supplementary material**

### **Leaching of major and minor elements during the transport and storage of coal ash obtained in power plant**

*Authors* Rada Krgović<sup>1</sup>, Jelena Trifković<sup>2</sup>, Dušanka Milojković-Opsenica<sup>2</sup>, Dragan Manojlović<sup>2</sup>, Jelena Mutić<sup>2\*</sup>

<sup>1</sup>*RTB Kolubara, Svetog Save 1, Lazarevac, Serbia*

<sup>2</sup>*Faculty of Chemistry, Studentski trg 12-16, P. O. Box 51, 11158 Belgrade 118, Serbia*

#### **Content**

Table S1. Parameters of descriptive statistics obtained from the mineral content analysis of samples from filter ash.

Table S2. Parameters of descriptive statistics obtained from the mineral content analysis of samples from active cassette.

Table S3. Parameters of descriptive statistics obtained from the mineral content analysis of samples from passive cassette, first depth.

Table S4. Parameters of descriptive statistics obtained from the mineral content analysis of samples from passive cassette, second depth.

Table S5. Results of determination metal concentration in river „Kolubara“.

Table S6. Results of Kruskal-Wallis test.

Table S7. Results of PCA models.

Table S8. Results of determination for each element in reference material ERM CC 141(Loam soil)

Figure S1. The contents of thirteen elements of coal ash by phases.

Table S1. Parameters of descriptive statistics obtained from the mineral content analysis of samples from filter ash.

| Parameter     |         | I phase | II phase | III phase | IV phase | V phase |
|---------------|---------|---------|----------|-----------|----------|---------|
| As<br>(mg/kg) | Mean    | 1.20    | 8.03     | 187.76    | 0.99     | 0.54    |
|               | SD      | 1.26    | 0.41     | 4.53      | 0.98     | 0.19    |
|               | Median  | 0.65    | 8.14     | 188.23    | 0.85     | 0.58    |
|               | Maximum | 4.37    | 8.68     | 193.00    | 3.59     | 0.79    |
|               | Minimum | 0.40    | 7.23     | 179.65    | 0.08     | 0.06    |
| Al<br>(mg/kg) | Mean    | 34.63   | 4.63     | 3336.10   | 592.75   | 1386.42 |
|               | SD      | 27.84   | 1.65     | 300.42    | 291.01   | 122.88  |
|               | Median  | 24.27   | 4.27     | 3263.85   | 503.15   | 1405.48 |
|               | Maximum | 93.40   | 8.38     | 3906.37   | 1098.83  | 1526.13 |
|               | Minimum | 6.80    | 2.85     | 2936.32   | 235.76   | 1139.80 |
| Ba<br>(mg/kg) | Mean    | 34.63   | 4.25     | 3291.64   | 588.86   | 6.34    |
|               | SD      | 27.84   | 2.00     | 279.80    | 292.18   | 1.81    |
|               | Median  | 24.27   | 4.14     | 3235.72   | 483.70   | 6.70    |
|               | Maximum | 93.40   | 8.38     | 3906.37   | 1098.83  | 7.96    |
|               | Minimum | 6.80    | 1.62     | 2936.32   | 235.76   | 1.73    |
| Ca<br>(mg/kg) | Mean    | nd      | nd       | 3.00      | nd       | 1038.61 |
|               | SD      | nd      | nd       | 3.54      | nd       | 54.55   |
|               | Median  | nd      | nd       | 1.96      | nd       | 1048.28 |
|               | Maximum | nd      | nd       | 9.88      | nd       | 1115.15 |
|               | Minimum | nd      | nd       | nd        | nd       | 960.94  |
| Cd<br>(mg/kg) | Mean    | 0.02    | 0.13     | 0.29      | 0.05     | nd      |
|               | SD      | 0.02    | 0.01     | 0.14      | 0.05     | nd      |
|               | Median  | 0.01    | 0.13     | 0.24      | 0.05     | nd      |
|               | Maximum | 0.06    | 0.15     | 0.67      | 0.14     | nd      |
|               | Minimum | nd      | 0.12     | 0.20      | nd       | nd      |
| Co<br>(mg/kg) | Mean    | nd      | 0.68     | 5.67      | 1.80     | 0.34    |
|               | SD      | nd      | 0.03     | 0.61      | 0.39     | 0.05    |
|               | Median  | nd      | 0.67     | 5.73      | 1.71     | 0.33    |
|               | Maximum | nd      | 0.73     | 6.56      | 2.60     | 0.42    |
|               | Minimum | nd      | 0.65     | 4.66      | 1.38     | 0.27    |
| Cr<br>(mg/kg) | Mean    | 2.06    | 0.77     | 26.34     | 15.56    | 2.28    |
|               | SD      | 0.07    | 0.04     | 4.03      | 2.90     | 0.17    |
|               | Median  | 2.06    | 0.77     | 26.74     | 15.34    | 2.28    |
|               | Maximum | 2.19    | 0.82     | 33.31     | 20.87    | 2.56    |
|               | Minimum | 1.95    | 0.72     | 19.34     | 11.11    | 2.07    |
| Cu<br>(mg/kg) | Mean    | 0.19    | 3.79     | 25.73     | 8.14     | 0.08    |
|               | SD      | 0.21    | 5.54     | 2.25      | 1.11     | 0.03    |
|               | Median  | 0.11    | 1.20     | 25.85     | 8.07     | 0.08    |
|               | Maximum | 0.53    | 17.15    | 28.79     | 10.51    | 0.16    |
|               | Minimum | nd      | 1.11     | 22.04     | 6.55     | 0.04    |
| Fe            | Mean    | 0.07    | 0.91     | 6726.34   | 2257.76  | 815.48  |

|               |         |        |       |         |         |        |
|---------------|---------|--------|-------|---------|---------|--------|
| (mg/kg)       | SD      | nd     | 0.41  | 862.07  | 458.98  | 60.49  |
|               | Median  | 0.07   | 1.04  | 6675.35 | 2100.90 | 807.08 |
|               | Maximum | 0.07   | 1.49  | 7834.17 | 3237.52 | 892.72 |
|               | Minimum | 0.07   | 0.25  | 5264.77 | 1775.12 | 709.70 |
| Mg<br>(mg/kg) | Mean    | 52.42  | 0.04  | 0.04    | 0.04    | 152.50 |
|               | SD      | 40.48  | 0.00  | 0.00    | 0.00    | 10.66  |
|               | Median  | 43.18  | 0.04  | 0.04    | 0.04    | 151.65 |
|               | Maximum | 110.41 | 0.04  | 0.04    | 0.04    | 165.78 |
|               | Minimum | 6.93   | 0.04  | 0.04    | 0.04    | 129.10 |
| Ni<br>(mg/kg) | Mean    | nd     | nd    | nd      | nd      | 1.52   |
|               | SD      | nd     | nd    | nd      | nd      | 0.32   |
|               | Median  | nd     | nd    | nd      | nd      | 1.61   |
|               | Maximum | nd     | nd    | nd      | nd      | 1.81   |
|               | Minimum | nd     | nd    | nd      | nd      | 0.66   |
| Pb<br>(mg/kg) | Mean    | nd     | 0.41  | 3.83    | 0.44    | 2.20   |
|               | SD      | nd     | 0.41  | 1.76    | 1.37    | 0.57   |
|               | Median  | nd     | 0.23  | 3.69    | 0.00    | 2.40   |
|               | Maximum | nd     | 1.29  | 7.61    | 4.36    | 2.60   |
|               | Minimum | nd     | 0.06  | 1.65    | 0.00    | 0.62   |
| Zn<br>(mg/kg) | Mean    | 1.06   | 5.02  | 21.68   | 6.27    | nd     |
|               | SD      | 1.27   | 4.36  | 1.89    | 1.82    | nd     |
|               | Median  | 0.81   | 3.04  | 22.28   | 5.80    | nd     |
|               | Maximum | 4.10   | 15.21 | 24.48   | 10.32   | nd     |
|               | Minimum | 0.00   | 2.74  | 18.76   | 4.47    | nd     |

nd (not detected, below detection limit of 0.05 µg/g)

Table S2. Parameters of descriptive statistics obtained from the mineral content analysis of samples from active cassette.

| Parameter     |         | I phase | II phase | III phase | IV phase | V phase |
|---------------|---------|---------|----------|-----------|----------|---------|
| As<br>(mg/kg) | Mean    | 18.51   | 58.94    | 267.77    | 0.05     | 0.71    |
|               | SD      | 5.88    | 86.14    | 168.48    | 0.05     | 0.48    |
|               | Median  | 17.34   | 22.92    | 175.49    | 0.04     | 0.59    |
|               | Maximum | 29.43   | 287.55   | 550.62    | 0.13     | 1.56    |
|               | Minimum | 10.35   | 6.02     | 110.96    | 0.00     | 0.12    |
| Al<br>(mg/kg) | Mean    | 18.12   | 5.48     | 3371.55   | 626.82   | 1148.91 |
|               | SD      | 7.41    | 2.81     | 371.62    | 333.12   | 143.75  |
|               | Median  | 16.30   | 5.43     | 3483.18   | 509.78   | 1118.85 |
|               | Maximum | 27.45   | 11.51    | 3752.77   | 1107.42  | 1386.22 |
|               | Minimum | 7.03    | 2.29     | 2611.33   | 285.64   | 967.24  |
| Ba<br>(mg/kg) | Mean    | 2.33    | 71.64    | 90.45     | 57.41    | 5.44    |
|               | SD      | 1.13    | 24.71    | 42.40     | 16.19    | 2.67    |
|               | Median  | 2.39    | 57.95    | 84.27     | 53.34    | 5.04    |
|               | Maximum | 3.84    | 99.95    | 155.36    | 84.02    | 9.54    |
|               | Minimum | 0.82    | 45.14    | 43.07     | 29.58    | 1.41    |
| Ca<br>(mg/kg) | Mean    | nd      | nd       | 4.53      | nd       | 1022.69 |
|               | SD      | nd      | nd       | 0.62      | nd       | 452.24  |
|               | Median  | nd      | nd       | 4.33      | nd       | 783.30  |
|               | Maximum | nd      | nd       | 6.19      | nd       | 1778.42 |
|               | Minimum | nd      | nd       | 4.05      | nd       | 697.50  |
| Cd<br>(mg/kg) | Mean    | 0.08    | 0.35     | 0.73      | 0.05     | nd      |
|               | SD      | 0.03    | 0.34     | 0.68      | 0.05     | nd      |
|               | Median  | 0.08    | 0.19     | 0.67      | 0.04     | nd      |
|               | Maximum | 0.12    | 1.26     | 1.78      | 0.13     | nd      |
|               | Minimum | 0.05    | 0.13     | 0.01      | 0.00     | nd      |
| Co<br>(mg/kg) | Mean    | 0.07    | 0.35     | 0.64      | 0.05     | 0.21    |
|               | SD      | 0.03    | 0.34     | 0.71      | 0.05     | 0.09    |
|               | Median  | 0.08    | 0.19     | 0.26      | 0.04     | 0.17    |
|               | Maximum | 0.12    | 1.26     | 1.78      | 0.13     | 0.35    |
|               | Minimum | 0.01    | 0.13     | 0.01      | 0.00     | 0.11    |
| Cr<br>(mg/kg) | Mean    | 0.04    | 0.17     | 23.77     | 14.80    | 1.70    |
|               | SD      | 0.03    | 0.06     | 6.00      | 3.42     | 0.48    |
|               | Median  | 0.03    | 0.16     | 22.21     | 14.60    | 1.59    |
|               | Maximum | 0.09    | 0.26     | 35.29     | 19.94    | 2.31    |
|               | Minimum | 0.01    | 0.10     | 16.17     | 10.49    | 0.89    |
| Cu<br>(mg/kg) | Mean    | 2.85    | 0.84     | 25.35     | 9.85     | 0.09    |
|               | SD      | 1.60    | 0.73     | 9.91      | 2.31     | 0.13    |
|               | Median  | 2.61    | 0.70     | 23.96     | 9.07     | 0.00    |
|               | Maximum | 6.05    | 2.84     | 38.38     | 15.11    | 0.29    |

|               |         |        |      |         |          |        |
|---------------|---------|--------|------|---------|----------|--------|
|               | Minimum | 0.33   | 0.33 | 13.66   | 7.48     | 0.00   |
| Fe<br>(mg/kg) | Mean    | 10.12  | 0.96 | 7487.29 | 5433.25  | 663.09 |
|               | SD      | 2.67   | 0.92 | 1115.21 | 9958.56  | 129.09 |
|               | Median  | 10.04  | 0.70 | 7502.97 | 2326.78  | 628.66 |
|               | Maximum | 15.12  | 3.18 | 9169.36 | 33746.90 | 885.54 |
|               | Minimum | 4.38   | 0.16 | 5694.91 | 1691.32  | 519.51 |
| Mg<br>(mg/kg) | Mean    | 193.52 | 0.04 | 0.04    | 0.04     | 122.28 |
|               | SD      | 61.36  | 0.00 | 0.00    | 0.00     | 26.66  |
|               | Median  | 193.64 | 0.04 | 0.04    | 0.04     | 111.26 |
|               | Maximum | 279.50 | 0.04 | 0.04    | 0.04     | 168.03 |
|               | Minimum | 115.72 | 0.04 | 0.04    | 0.04     | 100.12 |
| Ni<br>(mg/kg) | Mean    | 112.80 | 0.40 | nd      | nd       | 1.09   |
|               | SD      | 8.91   | 0.54 | nd      | nd       | 0.30   |
|               | Median  | 113.75 | 0.00 | nd      | nd       | 0.98   |
|               | Maximum | 122.90 | 1.31 | nd      | nd       | 1.52   |
|               | Minimum | 96.46  | 0.00 | nd      | nd       | 0.76   |
| Pb<br>(mg/kg) | Mean    | 1.07   | 0.13 | 4.41    | 0.25     | 1.81   |
|               | SD      | 0.90   | 0.10 | 2.08    | 0.17     | 0.62   |
|               | Median  | 0.93   | 0.10 | 4.54    | 0.27     | 1.76   |
|               | Maximum | 3.10   | 0.30 | 8.36    | 0.49     | 2.62   |
|               | Minimum | 0.15   | 0.02 | 1.75    | 0.02     | 0.66   |
| Zn<br>(mg/kg) | Mean    | 0.30   | 2.29 | 23.86   | 8.43     | 0.00   |
|               | SD      | 0.33   | 1.08 | 7.25    | 1.87     | 0.01   |
|               | Median  | 0.20   | 2.19 | 20.96   | 9.34     | 0.00   |
|               | Maximum | 1.17   | 4.70 | 34.16   | 10.18    | 0.02   |
|               | Minimum | 0.02   | 1.14 | 16.01   | 4.28     | 0.00   |

nd (not detected, below detection limit of 0.05 µg/g)

Table S3. Parameters of descriptive statistics obtained from the mineral content analysis of samples from passive cassette, first depth.

| Parameter     |         | I phase | II phase | III phase | IV phase | V phase |
|---------------|---------|---------|----------|-----------|----------|---------|
| As<br>(mg/kg) | Mean    | 3.09    | 10.62    | 20.14     | 6.76     | nd      |
|               | SD      | 0.37    | 4.74     | 4.60      | 1.57     | nd      |
|               | Median  | 3.18    | 10.43    | 20.03     | 7.25     | nd      |
|               | Maximum | 3.46    | 18.22    | 27.02     | 8.46     | nd      |
|               | Minimum | 2.31    | 1.01     | 13.41     | 3.45     | nd      |
| Al<br>(mg/kg) | Mean    | 17.56   | 793.75   | 3172.83   | 648.43   | 468.00  |
|               | SD      | 10.24   | 296.58   | 435.69    | 69.41    | 98.00   |
|               | Median  | 14.20   | 857.78   | 3282.52   | 643.53   | 487.65  |
|               | Maximum | 38.95   | 1141.99  | 3707.98   | 772.64   | 571.54  |
|               | Minimum | 5.71    | 0.80     | 2549.25   | 547.68   | 235.99  |
| Ba<br>(mg/kg) | Mean    | 2.33    | 74.82    | 90.96     | 31.08    | 1.61    |
|               | SD      | 1.12    | 24.99    | 42.71     | 4.38     | 0.69    |
|               | Median  | 2.35    | 75.32    | 82.25     | 31.51    | 1.74    |
|               | Maximum | 3.92    | 103.53   | 158.32    | 36.96    | 2.73    |
|               | Minimum | 0.85    | 43.07    | 40.67     | 24.21    | 0.39    |
| Ca<br>(mg/kg) | Mean    | nd      | nd       | 4.56      | nd       | 507.62  |
|               | SD      | nd      | nd       | 0.60      | nd       | 115.56  |
|               | Median  | nd      | nd       | 4.41      | nd       | 496.91  |
|               | Maximum | nd      | nd       | 6.06      | nd       | 769.44  |
|               | Minimum | nd      | nd       | 3.98      | nd       | 348.15  |
| Cd<br>(mg/kg) | Mean    | 0.03    | 0.20     | nd        | 0.06     | 0.01    |
|               | SD      | 0.02    | 0.06     | nd        | 0.03     | 0.00    |
|               | Median  | 0.02    | 0.22     | nd        | 0.07     | 0.01    |
|               | Maximum | 0.09    | 0.27     | nd        | 0.10     | 0.02    |
|               | Minimum | 0.02    | 0.03     | nd        | 0.00     | 0.01    |
| Co<br>(mg/kg) | Mean    | nd      | 1.97     | 2.95      | 2.14     | 0.10    |
|               | SD      | nd      | 0.26     | 0.81      | 0.26     | 0.07    |
|               | Median  | nd      | 1.95     | 2.82      | 2.18     | 0.12    |
|               | Maximum | nd      | 2.42     | 4.42      | 2.65     | 0.20    |
|               | Minimum | nd      | 1.54     | 1.85      | 1.72     | 0.00    |
| Cr<br>(mg/kg) | Mean    | 0.06    | 8.61     | 13.67     | 20.91    | 0.11    |
|               | SD      | 0.03    | 1.43     | 2.93      | 3.01     | 0.04    |
|               | Median  | 0.05    | 8.56     | 12.96     | 21.84    | 0.13    |
|               | Maximum | 0.14    | 11.17    | 19.67     | 23.78    | 0.15    |
|               | Minimum | 0.04    | 6.60     | 9.82      | 14.68    | 0.04    |
| Cu<br>(mg/kg) | Mean    | 0.12    | 5.79     | 15.90     | 8.93     | nd      |
|               | SD      | 0.06    | 2.21     | 3.79      | 2.45     | nd      |
|               | Median  | 0.13    | 5.99     | 15.46     | 8.12     | nd      |
|               | Maximum | 0.23    | 8.94     | 25.32     | 14.58    | nd      |

|               |         |        |         |         |         |        |
|---------------|---------|--------|---------|---------|---------|--------|
|               | Minimum | 0.03   | 0.71    | 10.90   | 6.40    | nd     |
| Fe<br>(mg/kg) | Mean    | 6.18   | 1863.38 | 3460.59 | 2953.95 | 395.71 |
|               | SD      | 8.70   | 701.04  | 815.05  | 332.95  | 114.99 |
|               | Median  | 1.06   | 2108.69 | 3332.82 | 3036.54 | 441.46 |
|               | Maximum | 24.63  | 2397.93 | 5410.24 | 3399.96 | 511.29 |
|               | Minimum | 0.12   | 0.36    | 2350.15 | 2488.86 | 201.34 |
| Mg<br>(mg/kg) | Mean    | 109.74 | 0.04    | 0.04    | 0.04    | 67.07  |
|               | SD      | 13.56  | 0.00    | 0.00    | 0.00    | 15.09  |
|               | Median  | 108.76 | 0.04    | 0.04    | 0.04    | 73.38  |
|               | Maximum | 132.92 | 0.04    | 0.04    | 0.04    | 79.05  |
|               | Minimum | 93.82  | 0.04    | 0.04    | 0.04    | 31.30  |
| Ni<br>(mg/kg) | Mean    | nd     | 6.82    | 15.26   | 12.01   | 0.98   |
|               | SD      | nd     | 2.52    | 3.81    | 1.07    | 0.32   |
|               | Median  | nd     | 7.48    | 15.27   | 12.33   | 1.03   |
|               | Maximum | nd     | 9.31    | 21.89   | 13.35   | 1.50   |
|               | Minimum | nd     | 0.28    | 9.11    | 9.86    | 0.48   |
| Pb<br>(mg/kg) | Mean    | 0.03   | 2.84    | 5.70    | 3.26    | 1.13   |
|               | SD      | 0.02   | 1.33    | 1.02    | 9.69    | 0.37   |
|               | Median  | 0.02   | 2.75    | 5.55    | 0.15    | 1.31   |
|               | Maximum | 0.07   | 5.98    | 7.39    | 30.84   | 1.43   |
|               | Minimum | 0.00   | 0.80    | 4.60    | 0.08    | 0.19   |
| Zn<br>(mg/kg) | Mean    | 0.04   | 8.15    | 5.89    | 4.96    | nd     |
|               | SD      | 0.07   | 2.97    | 1.40    | 0.61    | nd     |
|               | Median  | 0.01   | 8.48    | 5.30    | 4.82    | nd     |
|               | Maximum | 0.21   | 11.66   | 9.17    | 6.32    | nd     |
|               | Minimum | 0.00   | 0.47    | 4.26    | 3.97    | nd     |

nd (not detected, below detection limit of 0.05 µg/g)

Table S4. Parameters of descriptive statistics obtained from the mineral content analysis of samples from passive cassette, second depth.

| Parameter     |         | I phase | II phase | III phase | IV phase | V phase |
|---------------|---------|---------|----------|-----------|----------|---------|
| As<br>(mg/kg) | Mean    | 3.09    | 8.60     | 37.19     | 5.55     | 0.02    |
|               | SD      | 0.31    | 6.02     | 30.35     | 2.44     | 0.04    |
|               | Median  | 3.05    | 11.31    | 26.89     | 5.82     | 0.01    |
|               | Maximum | 3.81    | 15.48    | 120.40    | 10.56    | 0.13    |
|               | Minimum | 2.76    | 1.15     | 19.14     | 1.90     | 0.00    |
| Al<br>(mg/kg) | Mean    | 44.89   | 322.52   | 3163.95   | 736.49   | 559.42  |
|               | SD      | 41.02   | 267.51   | 567.59    | 178.40   | 70.01   |
|               | Median  | 21.02   | 522.40   | 3175.00   | 651.81   | 572.80  |
|               | Maximum | 123.56  | 541.89   | 3921.80   | 1057.87  | 646.43  |
|               | Minimum | 14.33   | 7.28     | 2527.21   | 553.30   | 419.93  |
| Ba<br>(mg/kg) | Mean    | 0.73    | 81.81    | 28.48     | 28.37    | 2.32    |
|               | SD      | 0.20    | 32.07    | 6.84      | 4.56     | 0.54    |
|               | Median  | 0.70    | 102.33   | 27.43     | 27.89    | 2.11    |
|               | Maximum | 1.04    | 111.16   | 43.96     | 35.47    | 3.33    |
|               | Minimum | 0.44    | 40.60    | 20.01     | 22.33    | 1.67    |
| Ca<br>(mg/kg) | Mean    | 0.01    | 0.01     | 9.35      | 0.01     | 622.60  |
|               | SD      | 0.00    | 0.00     | 6.10      | 0.00     | 192.88  |
|               | Median  | 0.01    | 0.01     | 7.20      | 0.01     | 528.00  |
|               | Maximum | 0.01    | 0.01     | 24.51     | 0.01     | 900.59  |
|               | Minimum | 0.01    | 0.01     | 4.66      | 0.01     | 403.34  |
| Cd<br>(mg/kg) | Mean    | 0.03    | 0.17     | nd        | 0.09     | 0.01    |
|               | SD      | 0.02    | 0.07     | nd        | 0.05     | 0.00    |
|               | Median  | 0.02    | 0.21     | nd        | 0.08     | 0.01    |
|               | Maximum | 0.05    | 0.23     | nd        | 0.19     | 0.01    |
|               | Minimum | 0.01    | 0.06     | nd        | 0.03     | 0.00    |
| Co<br>(mg/kg) | Mean    | 0.01    | 1.30     | 2.93      | 5.99     | 0.14    |
|               | SD      | 0.01    | 1.05     | 0.47      | 0.83     | 0.04    |
|               | Median  | 0.01    | 2.06     | 2.77      | 5.74     | 0.13    |
|               | Maximum | 0.04    | 2.16     | 3.57      | 7.93     | 0.20    |
|               | Minimum | 0.00    | 0.07     | 2.20      | 5.17     | 0.09    |
| Cr<br>(mg/kg) | Mean    | 0.14    | 5.38     | 13.09     | 17.57    | 1.20    |
|               | SD      | 0.15    | 4.62     | 2.27      | 2.41     | 0.17    |
|               | Median  | 0.04    | 7.90     | 12.98     | 16.81    | 1.16    |
|               | Maximum | 0.39    | 9.78     | 18.91     | 21.11    | 1.54    |
|               | Minimum | 0.03    | 0.05     | 10.67     | 14.43    | 0.98    |
| Cu<br>(mg/kg) | Mean    | 0.22    | 3.65     | 14.98     | 7.88     | nd      |
|               | SD      | 0.16    | 2.85     | 3.17      | 0.79     | nd      |
|               | Median  | 0.14    | 5.40     | 13.90     | 7.92     | nd      |
|               | Maximum | 0.51    | 6.69     | 22.02     | 8.74     | nd      |



|               |         |       |         |         |         |        |
|---------------|---------|-------|---------|---------|---------|--------|
|               | Minimum | 0.09  | 0.12    | 11.01   | 6.07    | nd     |
| Fe<br>(mg/kg) | Mean    | 19.12 | 1178.42 | 4037.72 | 2627.41 | 466.42 |
|               | SD      | 24.77 | 1022.92 | 664.04  | 294.59  | 59.08  |
|               | Median  | 0.89  | 1731.39 | 3813.01 | 2636.26 | 461.59 |
|               | Maximum | 59.66 | 2247.15 | 5171.57 | 3025.83 | 557.83 |
|               | Minimum | 0.19  | 1.68    | 3334.01 | 2104.00 | 379.97 |
| Mg<br>(mg/kg) | Mean    | 81.21 | 0.04    | 0.04    | 0.04    | 73.10  |
|               | SD      | 10.28 | 0.00    | 0.00    | 0.00    | 9.29   |
|               | Median  | 84.17 | 0.04    | 0.04    | 0.04    | 74.85  |
|               | Maximum | 92.96 | 0.04    | 0.04    | 0.04    | 86.52  |
|               | Minimum | 61.28 | 0.04    | 0.04    | 0.04    | 58.57  |
| Ni<br>(mg/kg) | Mean    | nd    | 4.91    | 17.58   | 12.38   | 1.07   |
|               | SD      | nd    | 3.74    | 3.48    | 1.81    | 0.14   |
|               | Median  | nd    | 7.54    | 16.03   | 12.04   | 1.00   |
|               | Maximum | nd    | 8.28    | 22.74   | 15.35   | 1.29   |
|               | Minimum | nd    | 0.48    | 14.25   | 10.10   | 0.92   |
| Pb<br>(mg/kg) | Mean    | 0.07  | 1.52    | 4.52    | 0.20    | 1.32   |
|               | SD      | 0.04  | 1.27    | 1.28    | 0.13    | 0.10   |
|               | Median  | 0.05  | 2.28    | 4.92    | 0.20    | 1.29   |
|               | Maximum | 0.14  | 2.91    | 6.00    | 0.41    | 1.48   |
|               | Minimum | 0.04  | 0.01    | 2.34    | 0.00    | 1.20   |
| Zn<br>(mg/kg) | Mean    | 0.27  | 4.53    | 7.70    | 12.91   | nd     |
|               | SD      | 0.53  | 2.54    | 2.39    | 23.69   | nd     |
|               | Median  | 0.08  | 5.92    | 6.50    | 5.26    | nd     |
|               | Maximum | 1.74  | 7.19    | 11.50   | 80.19   | nd     |
|               | Minimum | 0.00  | 0.78    | 5.07    | 4.28    | nd     |

nd (not detected, below detection limit of 0.05 µg/g)

Table S5. Results of determination metal concentration in river „Kolubara“

| Parameter | I quartal | II quartal  | III quartal | IV quartal |
|-----------|-----------|-------------|-------------|------------|
| Mg, mg/L  | 11.8      | 12.3        | 12.4        | 11.4       |
| Ca, mg/L  | 62.7      | 66.9        | 65.6        | 54.3       |
| Fe, mg/L  | 0.4       | 0.3         | 0.2         | 0.2        |
| Al, mg/L  | 1.30      | 0.4         | 0.33        | 0.39       |
| Cu, mg/L  | 0.1       | 0.1         | 0.1         | 0.1        |
| Ni, µg/L  | n.d.      | 10          | 10          | 10         |
| As, µg/L  | n.d.      | <b>6.87</b> | n.d.        | n.d.       |
| Cd, µg/L  | 3         | 1.1         | n.d.        | n.d.       |
| Cr, µg/L  | 30        | 7.5         | 6.0         | 5.58       |
| Co, µg/L  | 18        | n.d.        | n.d.        | n.d.       |

nd (not detected, below detection limit of 1 µg/L)

Table S6. Results of Kruskal-Wallis test.

| Parameter |           | $\chi^2$ <sup>a</sup> | P       | KW Multiple comparison<br>Z-Value Test <sup>b</sup>                            |
|-----------|-----------|-----------------------|---------|--------------------------------------------------------------------------------|
| Al        | I phase   | 6.64                  | 0.0843  | Pa (Pb)<br>A (Pa, Pb)                                                          |
|           | II phase  | 24.06                 | <0.0001 | EF (Pa, Pb)<br>Pa (A, EF)<br>Pb (A, EF)                                        |
|           | III phase | 1.53                  | 0.6755  | -                                                                              |
|           | IV phase  | 3.24                  | 0.3561  | -                                                                              |
|           | V phase   | 24.02                 | <0.0001 | A (Pa)<br>EF (Pa, Pb)<br>Pa (A, EF)<br>Pb (EF)                                 |
| As        | I phase   | 29.03                 | <0.0001 | A (EF, Pa, Pb)<br>EF (A, Pa, Pb)<br>Pa (A, EF)<br>Pb (A, EF)<br>A (EF, Pa, Pb) |
|           | II phase  | 13.91                 | 0.0030  | EF (A)<br>Pa (A)<br>Pb (A)<br>A (Pa, Pb)                                       |
|           | III phase | 30.25                 | <0.0001 | EF (Pa, Pb)<br>Pa (A, EF)<br>Pb (A, EF)<br>A (Pa, Pb)                          |
|           | IV phase  | 32.61                 | <0.0001 | EF (Pa, Pb)<br>Pa (A, EF)<br>Pb (A, EF)<br>A (Pa, Pb)                          |
|           | V phase   | 20.53                 | 0.0001  | EF (Pa, Pb)<br>Pa (A, EF)<br>Pb (A, EF)                                        |
| Ba        | I phase   | 31.44                 | <0.0001 | A (EF, Pb)<br>EF (A, Pa, Pb)<br>Pa (EF, Pb)<br>Pb (A, EF, Pa)<br>A (EF)        |
|           | II phase  | 21.26                 | 0.0001  | EF (A, Pa, Pb)<br>Pa (EF)<br>Pb (EF)<br>A (EF, Pb)                             |
|           | III phase | 32.49                 | <0.0001 | EF (A, Pa, Pb)<br>Pa (EF, Pb)<br>Pb (A, EF, Pa)<br>A (EF, Pa, Pb)              |
|           | IV phase  | 31.49                 | <0.0001 | EF (A, Pa, Pb)<br>Pa (A, EF)<br>Pb (A, EF)<br>A (Pa)                           |
|           | V phase   | 17.16                 | 0.0007  | EA (Pa, Pb)<br>Pa (A, EF)<br>Pb (EF)                                           |
| Ca        | III phase | 16.08                 | 0.0011  | A (Pb)<br>EF (Pb)                                                              |

|    |           |       |         |                                                                                    |
|----|-----------|-------|---------|------------------------------------------------------------------------------------|
|    | V phase   | 18.31 | 0.0004  | Pa (Pb)<br>Pb (A, EF, Pa)<br>A (Pa, Pb)<br>EF (Pa, Pb)<br>Pa (A, EF)<br>Pb (A, EF) |
| Cd | I phase   | 22.19 | <0.0001 | A (EF, Pa, Pb)<br>EF (A, Pa)<br>Pa (A, EF)<br>Pb (A)                               |
|    | II phase  | 12.19 | 0.0068  | A (EF)<br>EF (A, Pa)<br>Pa (EF)                                                    |
|    | III phase | 29.39 | <0.0001 | A (Pa, Pb)<br>EF (Pa, Pb)<br>Pa (A, EF)<br>Pb (A, EF)                              |
|    | IV phase  | 4.88  | 0.1805  | EA (Pb)<br>Pb (EA)                                                                 |
|    | V phase   | 8.48  | 0.03706 | A (EF)<br>EF (A, Pa, Pb)<br>Pa (EF)<br>Pb (EF)                                     |
| Co | I phase   | 30.46 | <0.0001 | A (EF, Pa, Pb)<br>EF (A, Pa, Pb)<br>Pa (A, EF)<br>Pb (A, EF)<br>A (Pa, Pb)         |
|    | II phase  | 15.97 | 0.0011  | EF (Pa)<br>Pa (A, EF)<br>Pb (A)                                                    |
|    | III phase | 32.93 | <0.0001 | A (EF, Pa, Pb)<br>EF (A, Pa, Pb)<br>Pa (A, EF)<br>Pb (A, EF)                       |
|    | IV phase  | 34.16 | <0.0001 | A (EF, Pa, Pb)<br>EF (A, Pb)<br>Pa (A, Pb)<br>Pb (A, Pa)                           |
|    | V phase   | 16.00 | 0.0011  | A (EF)<br>EF (A, Pa, Pb)<br>Pa (EF)<br>Pb (EF)                                     |
| Cr | I phase   | 24.79 | <0.0001 | A (EF)<br>A (Pa, Pb)                                                               |
|    | II phase  | 18.46 | 0.0003  | EF (Pa)<br>Pa (A, EF, Pb)<br>Pb (A, Pa)                                            |
|    | III phase | 27.87 | <0.0001 | A (Pa, Pb)<br>EF (Pa, Pb)<br>Pa (A, EF)<br>Pb (A, EF)                              |
|    | IV phase  | 16.07 | 0.0011  | A (Pa)<br>EF (Pa)<br>Pa (A, EF)                                                    |
|    | V phase   | 23.43 | <0.0001 | A (Pa)<br>EF (Pa, Pb)<br>Pa (A, EF)<br>Pb (EF)                                     |
| Cu | I phase   | 21.47 | <0.0001 | A (EF, Pa, Pb)                                                                     |

|    |           |       |         |                                                                                          |
|----|-----------|-------|---------|------------------------------------------------------------------------------------------|
|    | II phase  | 14.40 | 0.0024  | EF (A)<br>Pa (A)<br>Pb (A)<br>A (EF, Pa, Pb)<br>EF (A)<br>Pa (A)<br>Pb (A)<br>A (Pa, Pb) |
|    | III phase | 20.99 | 0.0001  | EF (Pa, Pb)<br>Pa (A, EF)<br>Pb (A, EF)                                                  |
|    | IV phase  | 5.90  | 0.1163  | A (Pb)<br>Pb (A)                                                                         |
|    | V phase   | 12.12 | 0.0070  | EF (Pa, Pb)<br>Pa (EF)<br>Pb (EF)                                                        |
| Fe | I phase   | 23.45 | <0.0001 | A (EF)<br>EF (A, Pa, Pb)<br>Pa (EF)<br>Pb (EF)<br>A (Pa, Pb)                             |
|    | II phase  | 24.14 | <0.0001 | EF (Pa, Pb)<br>Pa (A, EF)<br>Pb (A, EF)<br>A (Pa, Pb)                                    |
|    | III phase | 30.83 | <0.0001 | EF (Pa, Pb)<br>Pa (A, EF)<br>Pb (A, EF)                                                  |
|    | IV phase  | 11.47 | 0.0094  | A (Pa)<br>EF (Pa)<br>Pa (A, EF)                                                          |
|    | V phase   | 21.79 | <0.0001 | A (Pa, Pb)<br>EF (Pa, Pb)<br>Pa (A, EF)<br>Pb (A, EF)                                    |
| Mg | I phase   | 29.93 | <0.0001 | A (EF, Pb)<br>EF (A, Pa)<br>Pa (EF, Pb)<br>Pb (A, Pa)<br>A (Pa, Pb)                      |
|    | V phase   | 21.67 | <0.0001 | EF (Pa, Pb)<br>Pa (A, EF)<br>Pb (A, EF)                                                  |
| Ni | I phase   | 21.95 | <0.0001 | A (EF, Pa, Pb)<br>EF (A)<br>Pa (A)<br>Pb (A)<br>A (Pa, Pb)                               |
|    | II phase  | 25.27 | <0.0001 | EF (Pa, Pb)<br>Pa (A, EF)<br>Pb (A, EF)<br>A (Pa, Pb)                                    |
|    | III phase | 29.69 | <0.0001 | EF (Pa, Pb)<br>Pa (A, EF)<br>Pb (A, EF)                                                  |
|    | IV phase  | 29.30 | <0.0001 | A (Pa, Pb)<br>EF (Pa, Pb)<br>Pa (A, EF)<br>Pb (A, EF)                                    |
|    | V phase   | 14.07 | 0.0028  | A (EF)                                                                                   |

|    |           |       |         | EF (A, Pa, Pb)<br>Pa (EF)<br>Pb (EF)                                       |
|----|-----------|-------|---------|----------------------------------------------------------------------------|
| Pb | I phase   | 34.82 | <0.0001 | A (EF, Pa, Pb)<br>EF (A, Pa, Pb)<br>Pa (A, EF)<br>Pb (A, EF)<br>A (Pa, Pb) |
|    | II phase  | 18.88 | 0.0003  | EF (Pa)<br>Pa (A, EF)<br>Pb (A, Pa)                                        |
|    | III phase | 7.11  | 0.0683  | EF (Pa)<br>Pa (EF)<br>A (EF)                                               |
|    | IV phase  | 12.08 | 0.0071  | EF (A, Pa, Pb)<br>Pa (EF)<br>Pb (EF)                                       |
|    | V phase   | 17.50 | 0.0006  | A (Pa)<br>EF (Pa, Pb)<br>Pa (A, EF)<br>Pb (EF)                             |
| Zn | I phase   | 10.16 | 0.0173  | A (Pa)<br>EF (Pa)<br>Pa (A, EF)<br>A (EF, Pa)                              |
|    | II phase  | 15.13 | 0.0017  | EF (A)<br>Pa (A, Pb)<br>Pb (Pa)                                            |
|    | III phase | 30.19 | <0.0001 | A (Pa, Pb)<br>EF (Pa, Pb)<br>Pa (A, EF)<br>Pb (A, EF)                      |
|    | IV phase  | 11.04 | 0.0115  | A (Pa, Pb)<br>Pa (A)<br>Pb (A)                                             |
|    | V phase   | 0.31  | 0.9581  | -                                                                          |

<sup>a</sup>  $\chi^2_{cr(df(3); \alpha=0.05)} = 7.81$

<sup>b</sup> Regular test: Medians significantly different if z-value > 1.9600

Table S7. Results of PCA models.

| <b>PCA model</b> | <b>No of PCs</b> | <b>% Variance<br/>captured by PC1</b> | <b>% Variance<br/>captured by PC2</b> | <b>% Variance<br/>captured by PC3</b> |
|------------------|------------------|---------------------------------------|---------------------------------------|---------------------------------------|
| I phase          | 3                | 47.84                                 | 15.51                                 | 14.07                                 |
| II phase         | 3                | 62.79                                 | 19.49                                 | 10.06                                 |
| III phase        | 6                | 49.83                                 | 15.74                                 | 10.36                                 |
| IV phase         | 3                | 31.17                                 | 16.16                                 | 13.15                                 |
| V phase          | 4                | 73.33                                 | 12.07                                 | 5.10                                  |

Table S8. Results of determination for each element in reference material ERM CC 141(Loam soil)

| Aqua regia<br>extractable<br>content | ERM CC 141 Loam soil                          |                                          |
|--------------------------------------|-----------------------------------------------|------------------------------------------|
|                                      | Certified value $\pm$ uncertainty*<br>(mg/kg) | Found value $\pm$ uncertainty<br>(mg/kg) |
| As                                   | $7.5 \pm 1.4$                                 | $7.9 \pm 0.6$                            |
| Cd                                   | $0.25 \pm 0.04$                               | $0.30 \pm 0.04$                          |
| Co                                   | $7.9 \pm 0.9$                                 | $8.0 \pm 0.2$                            |
| Cr                                   | $31 \pm 4$                                    | $33.2 \pm 0.2$                           |
| Cu                                   | $12.4 \pm 0.9$                                | $12.9 \pm 0.3$                           |
| Zn                                   | $50 \pm 4$                                    | $50.3 \pm 0.7$                           |
| Ni                                   | $21.9 \pm 1.6$                                | $23.0 \pm 0.2$                           |
| Pb                                   | $32.2 \pm 1.4$                                | $31.5 \pm 0.5$                           |
| Major<br>components                  | Additional material information<br>(g/kg)     | Found value (g/kg)                       |
| Al <sub>2</sub> O <sub>3</sub> **    | 167.0                                         | 170.8                                    |
| Fe <sub>2</sub> O <sub>3</sub> **    | 65.8                                          | 66.0                                     |
| CaO**                                | 6.2                                           | 5.8                                      |
| Mg**                                 | 6.8                                           | 5.9                                      |

\*uncertainty for 95 % confidence level (coverage factor k=2)

\*\*Obtained by k<sub>o</sub>-neutron activation analysis



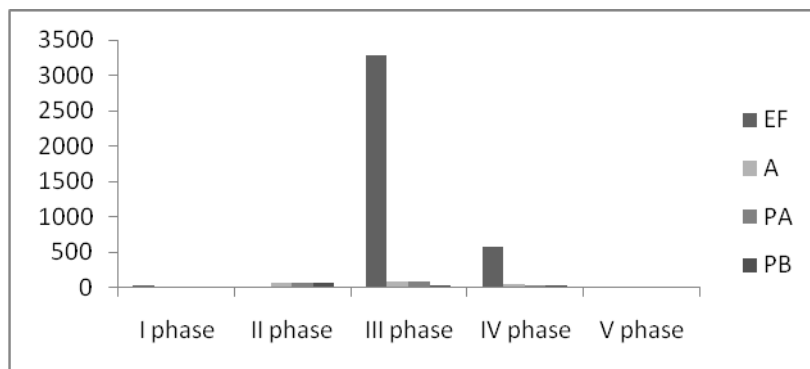

Ba

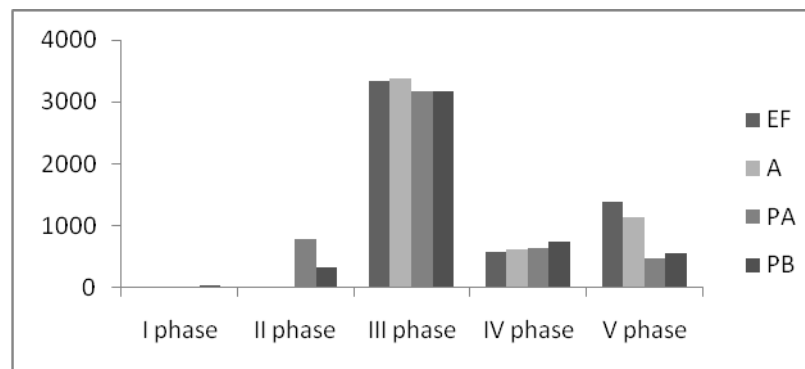

Al

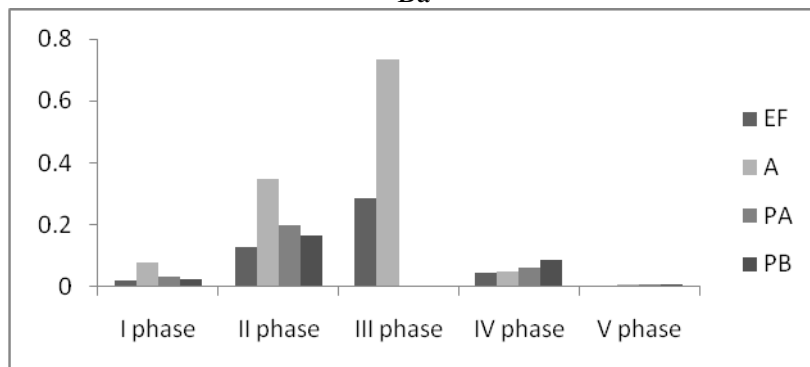

Cd

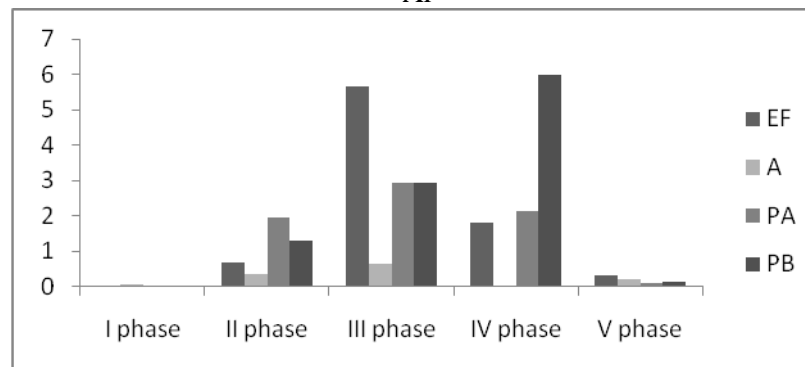

Co

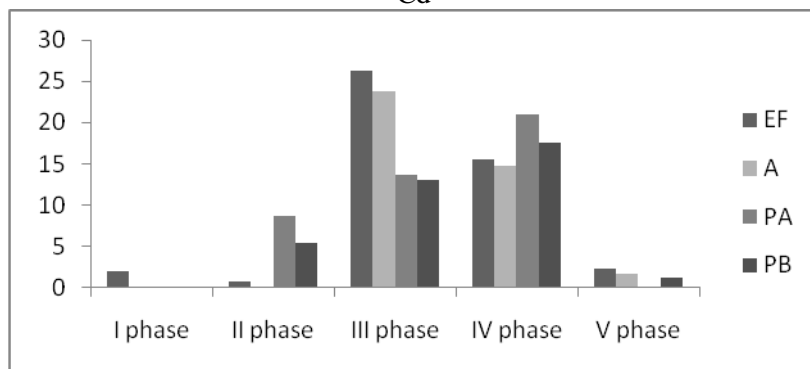

Cr

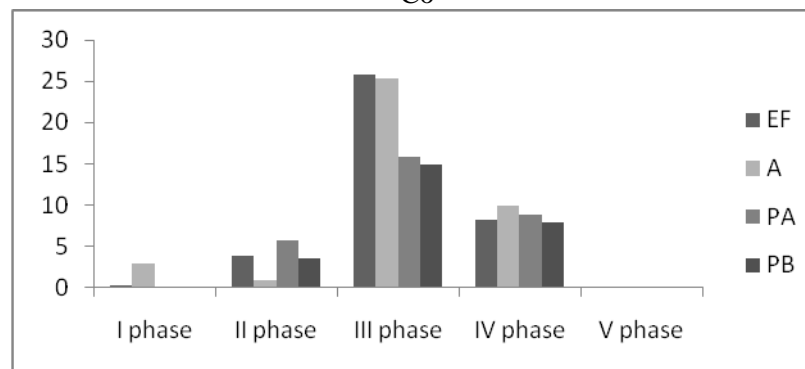

Cu

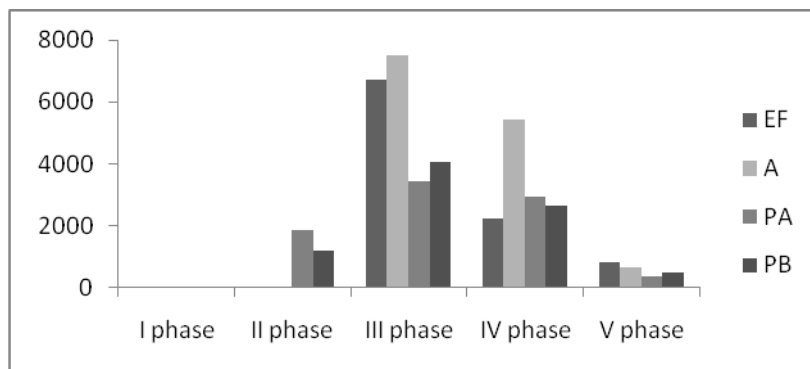

Fe

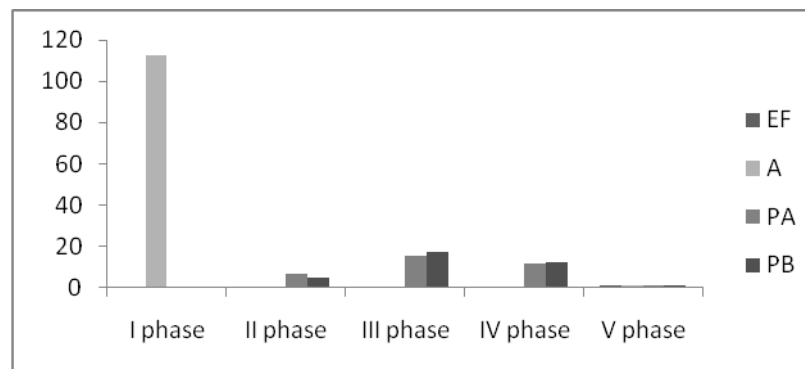

Ni

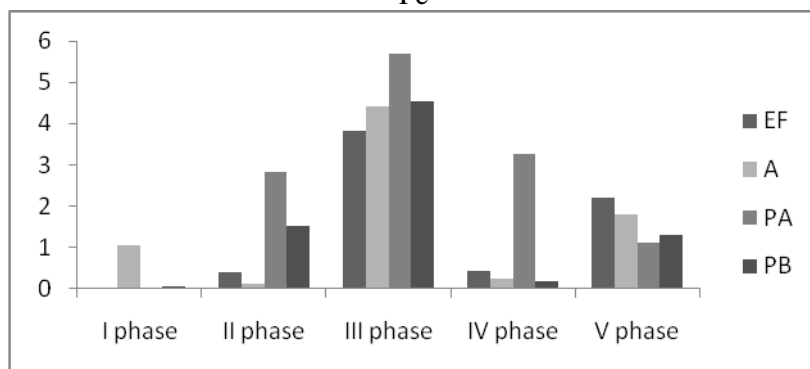

Pb

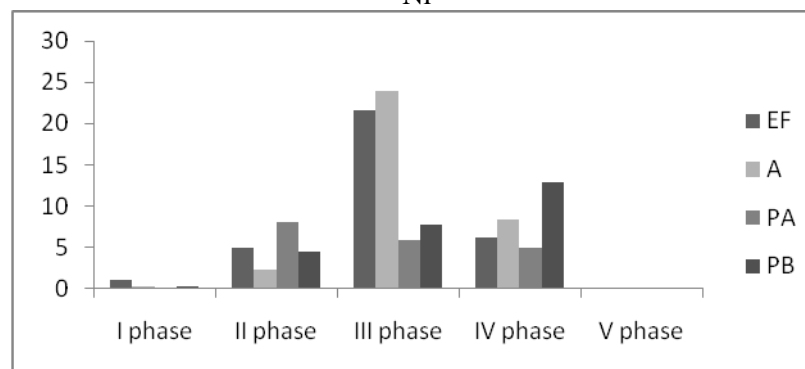

Zn

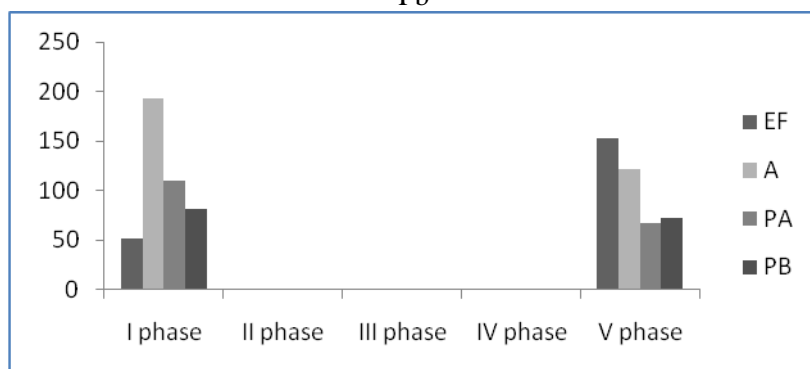

Mg

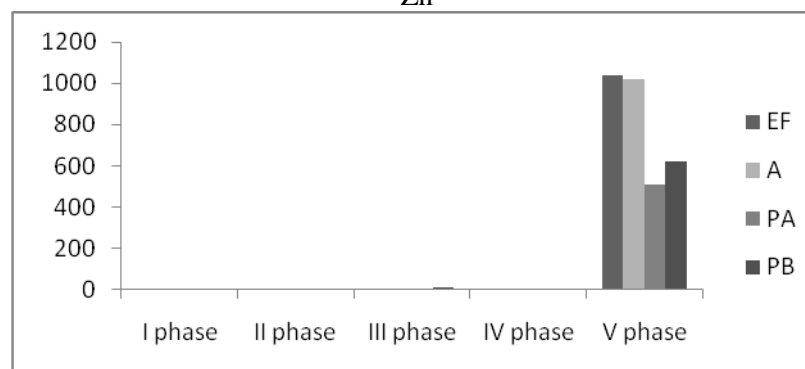

Ca

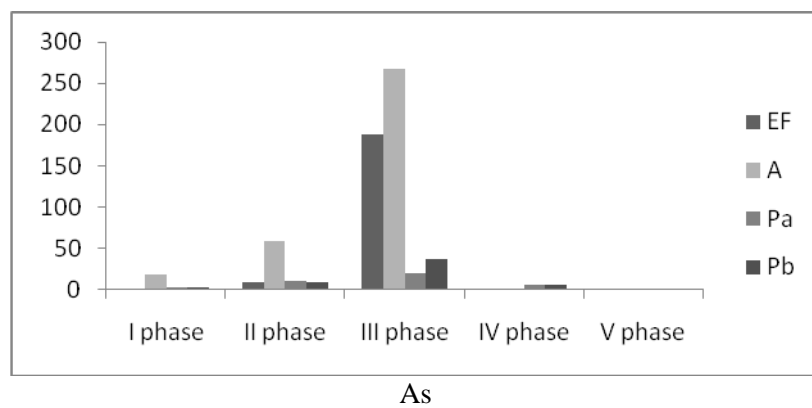

Figure S1. The contents of thirteen elements of coal ash by phases.
